# Supplementary material
Source: PubMed Central journal article supplement (PMC3671096)
Supplement: NIHMS458323-supplement-01.pdf [file NIHMS458323-supplement-01.pdf]

**Supplementary Table 1.** Association between tobacco use and self-reported heart disease (HD) with and without exclusion of participants who started the use of respective tobacco product after their HD was diagnosed

| Tobacco use                            | Participants without HD (%) | With exclusion <sup>†</sup> |                          | Without exclusion |                          |
|----------------------------------------|-----------------------------|-----------------------------|--------------------------|-------------------|--------------------------|
|                                        |                             | HD cases (%)                | Adjusted ORs (95% CIs) * | HD cases (%)      | Adjusted ORs (95% CIs) * |
| <b>Water-pipe smoking</b>              |                             |                             |                          |                   |                          |
| <i>Ever vs. never use</i>              |                             |                             |                          |                   |                          |
| Never                                  | 46,499 (99.0)               | 2990 (98.1)                 | Reference                | 2990 (98.1)       | Reference                |
| Ever                                   | 474 (1.0)                   | 51 (1.7)                    | 1.09 (0.80-1.48)         | 59 (1.9)          | 1.27 (0.95-1.69)         |
| <i>Moderate-high vs. never-low use</i> |                             |                             |                          |                   |                          |
| ≤ 50 water-pipe-years                  | 46,872 (99.8)               | 3022 (99.4)                 | Reference                | 3030 (99.4)       | Reference                |
| > 50 water-pipe-years                  | 101 (0.2)                   | 19 (0.6)                    | 1.83 (1.10-3.07)         | 19 (0.6)          | 1.82 (1.09-3.05)         |
| <i>Cumulative use</i>                  |                             |                             |                          |                   |                          |
| Never                                  | 46,499 (99.0)               | 2990 (98.3)                 | Reference                | 2990 (98.1)       | Reference                |
| ≤ 50 water-pipe-years                  | 373 (0.8)                   | 32 (1.0)                    | 0.87 (0.60-1.28)         | 40 (1.3)          | 1.10 (0.78-1.56)         |
| 50.1 – 100                             | 46 (0.1)                    | 6 (0.2)                     | 1.25 (0.52-3.03)         | 6 (0.2)           | 1.26 (0.52-3.04)         |
| 100.1 – 180                            | 38 (0.1)                    | 5 (0.2)                     | 1.49 (0.57-3.87)         | 5 (0.2)           | 1.49 (0.57-3.87)         |
| > 180                                  | 17 (0.04)                   | 8 (0.3)                     | 3.75 (1.52-9.22)         | 8 (0.3)           | 3.75 (1.52-9.23)         |
|                                        |                             |                             | <i>P</i> trend: 0.04     |                   | <i>P</i> trend: 0.008    |
| <b>Cigarette smoking</b>               |                             |                             |                          |                   |                          |
| <i>Ever vs. never use</i>              |                             |                             |                          |                   |                          |
| Never                                  | 39,040 (83.1)               | 2405 (79.7)                 | Reference                | 2405 (78.9)       | Reference                |
| Ever                                   | 7941 (16.9)                 | 614 (20.3)                  | 1.63 (1.45-1.83)         | 644 (21.1)        | 1.74 (1.55-1.94)         |
| <i>Moderate-high vs. never-low use</i> |                             |                             |                          |                   |                          |
| ≤ 5 pack-years                         | 41,628 (88.6)               | 2559 (85.3)                 | Reference                | 2584 (84.8)       | Reference                |
| > 5 pack-years                         | 5353 (11.4)                 | 460 (14.7)                  | 1.76 (1.55-1.99)         | 465 (15.2)        | 1.74 (1.54-1.97)         |

**Cumulative use**

|                |               |             |                        |             |                        |
|----------------|---------------|-------------|------------------------|-------------|------------------------|
| Never          | 39,040 (83.1) | 2405 (79.7) | Reference              | 2405 (78.9) | Reference              |
| ≤ 5 pack-years | 2588 (5.5)    | 154 (5.1)   | 1.26 (1.05-1.52)       | 179 (5.9)   | 1.49 (1.26-1.77)       |
| 5.1 – 10       | 1187 (2.5)    | 73 (2.4)    | 1.43 (1.11-1.84)       | 76 (2.5)    | 1.50 (1.17-1.93)       |
| 10.1 – 20.0    | 1677 (3.6)    | 121 (4.0)   | 1.73 (1.41-2.13)       | 122 (4.0)   | 1.77 (1.44-2.17)       |
| > 20           | 2489 (5.3)    | 266 (8.8)   | 2.04 (1.74-2.38)       | 267 (8.7)   | 2.07 (1.77-2.41)       |
|                |               |             | <i>P</i> trend: <0.001 |             | <i>P</i> trend: <0.001 |

**Nass chewing****Ever vs. never use**

|       |               |             |                  |             |                  |
|-------|---------------|-------------|------------------|-------------|------------------|
| Never | 43,489 (92.5) | 2775 (92.5) | Reference        | 2775 (91.0) | Reference        |
| Ever  | 3501 (7.5)    | 225 (7.5)   | 0.85 (0.73-1.00) | 276 (9.0)   | 1.06 (0.91-1.22) |

**Moderate-high vs. never-low use**

|                 |               |             |                  |             |                  |
|-----------------|---------------|-------------|------------------|-------------|------------------|
| ≤ 50 nass-years | 45,167 (96.1) | 2859 (95.3) | Reference        | 2906 (95.3) | Reference        |
| > 50 nass-years | 1823 (3.9)    | 141 (4.7)   | 0.95 (0.79-1.15) | 145 (4.7)   | 0.94 (0.78-1.14) |

**Cumulative use**

|                 |               |             |                      |             |                      |
|-----------------|---------------|-------------|----------------------|-------------|----------------------|
| Never           | 43,489 (92.5) | 2775 (92.5) | Reference            | 2775 (91.0) | Reference            |
| ≤ 50 nass-years | 1678 (3.6)    | 84 (2.8)    | 0.75 (0.60-0.95)     | 131 (4.3)   | 1.19 (0.97-1.44)     |
| 50.1 – 100      | 592 (1.3)     | 43 (1.4)    | 0.98 (0.71-1.36)     | 45 (1.5)    | 1.04 (0.75-1.43)     |
| 100.1 – 180     | 497 (1.0)     | 35 (1.2)    | 0.90 (0.62-1.28)     | 36 (1.2)    | 0.93 (0.65-1.32)     |
| > 180           | 734 (1.6)     | 63 (2.1)    | 0.91 (0.69-1.20)     | 64 (2.1)    | 0.93 (0.70-1.22)     |
|                 |               |             | <i>P</i> trend: 0.24 |             | <i>P</i> trend: 0.80 |

CI, confidence interval; OR, odds ratio. Numbers may not add up to the total numbers due to missing data in some variables.

\* All results for each tobacco product were adjusted for cumulative use of the other products listed in this table, as well as for age, sex, ethnicity, place of residence, education level, wealth, physical activity, body mass index, hypertension, and self-reported diabetes.

† Among HD cases, those who started the use of the tobacco product after receiving a diagnosis of HD were excluded from the analyses related to the respective product.

**Supplementary Table 2.** Distribution of intake of selected medications in the Golestan Cohort Study, baseline data

| <b>Medication</b>                  | <b>HD cases (%)</b> | <b>Participants without HD (%)</b> |
|------------------------------------|---------------------|------------------------------------|
| Nitrate compounds *                | 940 (30.8)          | 171 (0.4)                          |
| Anti angina (not specified)        | 43 (1.4)            | 0 (0.0)                            |
| Cardiac medicine (not specified)   | 134 (4.4)           | 14 (0.03)                          |
| Atorvastatin                       | 51 (1.7)            | 36 (0.1)                           |
| Amlodipine                         | 201 (6.6)           | 373 (0.8)                          |
| Verapamil                          | 22 (0.7)            | 23 (0.1)                           |
| Metoprolol                         | 25 (0.8)            | 17 (0.04)                          |
| Diltiazem                          | 152 (5.0)           | 42 (0.1)                           |
| Enalapril                          | 182 (6.0)           | 573 (1.2)                          |
| Aspirin                            | 935 (30.7)          | 927 (2.0)                          |
| Warfarin, Ticlopidine, Clopidogrel | 56 (1.8)            | 27 (0.1)                           |
| Beta blocker                       | 1108 (36.3)         | 5704 (12.1)                        |
| Lipid lowering                     | 190 (6.2)           | 672 (1.4)                          |
| Glucose lowering                   | 395 (13.0)          | 2078 (4.4)                         |
| Digoxin                            | 145 (4.8)           | 27 (0.1)                           |
| Plus nitrate compounds *           | 49 (1.6)            | 5 (0.0)                            |

HD, heart disease

\* Including medications containing trinitroglycerin, isosorbide dinitrate, and glyceryltrinitrate compounds.

**Supplementary Table 3.** Association between some traditional risk factors of IHD and self-reported HD in the Golestan Cohort Study

| <b>Characteristics</b>        | <b>Unadjusted<br/>OR (95% CI)</b> | <b>Adjusted<br/>OR (95% CI) *</b> |
|-------------------------------|-----------------------------------|-----------------------------------|
| <b>Age (years)</b>            | 1.06 (1.05-1.06)                  | 1.05 (1.04-1.05)                  |
| <b>Physical activity</b>      |                                   |                                   |
| Irregular non-intense         | Reference                         | Reference                         |
| Regular non-intense           | 0.66 (0.60-0.72)                  | 0.73 (0.66-0.81)                  |
| Regular or irregular intense  | 0.45 (0.39-0.52)                  | 0.59 (0.50-0.69)                  |
|                               | <i>P</i> trend: <0.001            | <i>P</i> trend: <0.001            |
| <b>BMI (kg/m<sup>2</sup>)</b> | 1.03 (1.03-1.04)                  | 1.03 (1.02-1.04)                  |
| <b>Hypertension †</b>         |                                   |                                   |
| Normotensive                  | Reference                         | Reference                         |
| Hypertensive                  | 2.80 (2.60-3.03)                  | 1.99 (1.83-2.17)                  |
| <b>Self-reported diabetes</b> |                                   |                                   |
| Non-diabetic                  | Reference                         | Reference                         |
| Diabetic                      | 3.51 (3.18-3.88)                  | 2.47 (2.23-2.74)                  |

BMI, body mass index; CI, confidence interval; HD, heart disease; IHD, ischemic heart disease; OR, odds ratio.

\* Adjusted for other variables in this table and for sex, ethnicity, place of residence, education level, wealth, and cumulative use of water-pipe, cigarette, and nass at baseline.

† Including self-reported hypertension and individuals with high blood pressure at the baseline examination.

**Supplementary Table 4.** Association between water-pipe smoking and self-reported HD in the Golestan Cohort Study using different cutpoints

| <b>Water-pipe smoking</b> (water-pipe-years) † | <b>HD cases (%)</b> | <b>Participants without HD (%)</b> | <b>Unadjusted OR (95% CI)</b> | <b>Adjusted OR (95% CI) *</b> |
|------------------------------------------------|---------------------|------------------------------------|-------------------------------|-------------------------------|
| Never                                          | 2990 (98.3)         | 46,499 (99.0)                      | Reference                     | Reference                     |
| < 39                                           | 30 (1.0)            | 353 (0.7)                          | 1.32 (0.91-1.92)              | 0.88 (0.59-1.30)              |
| ≥ 39                                           | 21 (0.7)            | 121 (0.3)                          | 2.70 (1.70-4.30)              | 1.65 (1.01-2.69)              |
|                                                |                     |                                    | <i>P</i> trend: <0.001        | <i>P</i> trend: 0.23          |
| Never                                          | 2990 (98.3)         | 46,499 (99.0)                      | Reference                     | Reference                     |
| < 50                                           | 32 (1.1)            | 373 (0.8)                          | 1.33 (0.93-1.92)              | 0.87 (0.60-1.28)              |
| ≥ 50                                           | 19 (0.6)            | 101 (0.2)                          | 2.93 (1.79-4.78)              | 1.83 (1.04-3.05)              |
|                                                |                     |                                    | <i>P</i> trend: <0.001        | <i>P</i> trend: 0.19          |
| Never                                          | 2990 (98.3)         | 46,499 (99.0)                      | Reference                     | Reference                     |
| < 40                                           | 31 (1.0)            | 360 (0.8)                          | 1.34 (0.93-1.94)              | 0.89 (0.60-1.30)              |
| 40-79                                          | 7 (0.2)             | 47 (0.1)                           | 2.32 (1.05-5.13)              | 1.30 (0.56-3.00)              |
| ≥ 80                                           | 13 (0.4)            | 67 (0.1)                           | 3.02 (1.66-5.47)              | 1.95 (1.05-3.63)              |
|                                                |                     |                                    | <i>P</i> trend: <0.001        | <i>P</i> trend: 0.13          |
| Never                                          | 2990 (98.3)         | 46,499 (99.0)                      | Reference                     | Reference                     |
| < 50                                           | 32 (1.1)            | 373 (0.8)                          | 1.33 (0.93-1.91)              | 0.87 (0.60-1.28)              |
| 50-99                                          | 6 (0.2)             | 46 (0.1)                           | 2.03 (0.86-4.74)              | 1.25 (0.52-3.03)              |
| ≥ 100                                          | 13 (0.4)            | 55 (0.1)                           | 3.68 (2.00-6.72)              | 2.30 (1.22-4.35)              |
|                                                |                     |                                    | <i>P</i> trend: <0.001        | <i>P</i> trend: 0.08          |

CI, confidence interval; HD, heart disease; OR, odds ratio.

\* Adjusted for age, sex, ethnicity, place of residence, education level, wealth, physical activity, body mass index, hypertension, self-reported diabetes, and cumulative use of cigarette and nass (variables were as shown in Tables 1 and 2).

† Cumulative use; 100 water-pipe-years, for example, indicates water-pipe use equivalent to use 10 times per day for 10 years (or use 5 times per day for 20 years). Among HD cases, those who started hookah smoking after HD being diagnosed were excluded from the analyses.

**Supplementary Table 5.** Association of self-reported HD with water-pipe smoking and nass chewing among never cigarette smokers

| Characteristics             | HD cases (%) | Participants without HD (%) | Unadjusted OR (95% CI) | Adjusted OR (95% CI) * |
|-----------------------------|--------------|-----------------------------|------------------------|------------------------|
| <b>Water-pipe smoking †</b> |              |                             |                        |                        |
| Never use                   | 2363 (98.5)  | 38,646 (99.0)               | Reference              | Reference              |
| ≤ 50 water-pipe-years       | 22 (0.9)     | 290 (0.7)                   | 1.24 (0.80-1.92)       | 0.86 (0.55-1.36)       |
| 50.1 – 100                  | 5 (0.2)      | 38 (0.1)                    | 2.15 (0.85-5.47)       | 1.33 (0.50-3.49)       |
| 100.1 – 180                 | 4 (0.2)      | 36 (0.1)                    | 1.82 (0.64-5.11)       | 1.27 (0.44-3.67)       |
| > 180                       | 6 (0.2)      | 13 (0.03)                   | 7.54 (2.87-19.88)      | 3.91 (1.31-11.66)      |
|                             |              |                             | <i>P</i> trend: <0.001 | <i>P</i> trend: 0.05   |
| <b>Nass chewing †</b>       |              |                             |                        |                        |
| Never use                   | 2295 (95.9)  | 37,396 (95.8)               | Reference              | Reference              |
| ≤ 50 nass-years             | 40 (1.7)     | 696 (1.8)                   | 0.94 (0.68-1.29)       | 0.99 (0.71-1.38)       |
| 50.1 – 100                  | 15 (0.6)     | 278 (0.7)                   | 0.88 (0.52-1.48)       | 0.81 (0.47-1.39)       |
| 100.1 – 180                 | 17 (0.7)     | 148 (0.6)                   | 1.12 (0.68-1.83)       | 0.98 (0.59-1.63)       |
| > 180                       | 26 (1.1)     | 420 (1.1)                   | 1.01 (0.68-1.50)       | 0.75 (0.50-1.14)       |
|                             |              |                             | <i>P</i> trend: 0.27   | <i>P</i> trend: 0.19   |

CI, confidence interval; HD, heart disease; OR, odds ratio.

\* Adjusted for cumulative use of the other tobacco product in this table, age, sex, ethnicity, place of residence, education level, wealth, physical activity, body mass index, hypertension, and self-reported diabetes (variables were as shown in Tables 1 and 2).

† Cumulative use. Those who started the use of the tobacco product after HD being diagnosed were excluded from the analyses related to the respective product.

**Supplementary Table 6.** Distribution of covariates by water-pipe smoking

| Covariate                     | Never          | Ever (water-pipe- years) |            |            |            |
|-------------------------------|----------------|--------------------------|------------|------------|------------|
|                               |                | ≤ 50                     | 50.1-100   | 100.1-180  | > 180      |
| <b>Total</b>                  | 49,489 (99.00) | 405 (0.81)               | 52 (0.10)  | 43 (0.09)  | 25 (0.05)  |
| <b>Age (years)</b>            | 52.1 (9.0)     | 54.5 (9.7)               | 58.7 (9.1) | 59.6 (8.5) | 64.8 (9.2) |
| <b>Sex</b>                    |                |                          |            |            |            |
| Women                         | 28,453 (98.81) | 265 (0.92)               | 31 (0.11)  | 31 (0.11)  | 15 (0.05)  |
| Men                           | 21,036 (99.14) | 140 (0.66)               | 21 (0.10)  | 12 (0.06)  | 10 (0.05)  |
| <b>Ethnicity</b>              |                |                          |            |            |            |
| Non-Turkmen                   | 12,291 (96.26) | 363 (2.84)               | 48 (0.38)  | 42 (0.33)  | 24 (0.19)  |
| Turkmen                       | 37,198 (99.87) | 42 (0.11)                | 4 (0.01)   | 1 (0.00)   | 1 (0.00)   |
| <b>Place of residence</b>     |                |                          |            |            |            |
| Rural                         | 39,639 (99.10) | 273 (0.68)               | 37 (0.09)  | 35 (0.09)  | 17 (0.04)  |
| Urban                         | 9850 (98.37)   | 132 (1.32)               | 15 (0.15)  | 8 (0.08)   | 8 (0.08)   |
| <b>Education</b>              |                |                          |            |            |            |
| No School                     | 34,679 (98.80) | 320 (0.91)               | 44 (0.13)  | 37 (0.11)  | 20 (0.06)  |
| Primary/middle school         | 10,605 (99.14) | 73 (0.68)                | 8 (0.07)   | 6 (0.06)   | 5 (0.05)   |
| High school                   | 3143 (99.68)   | 10 (0.32)                | 0 (0.00)   | 0 (0.00)   | 0 (0.00)   |
| University                    | 1062 (99.81)   | 2 (0.19)                 | 0 (0.00)   | 0 (0.00)   | 0 (0.00)   |
| <b>Wealth</b>                 |                |                          |            |            |            |
| Low                           | 14,385 (98.66) | 138 (0.95)               | 21 (0.14)  | 26 (0.18)  | 10 (0.07)  |
| Low-Medium                    | 9965 (98.75)   | 101 (1.00)               | 13 (0.13)  | 4 (0.04)   | 8 (0.08)   |
| Medium-High                   | 12,256 (99.29) | 71 (0.58)                | 9 (0.07)   | 6 (0.05)   | 2 (0.02)   |
| High                          | 12,880 (99.11) | 95 (0.73)                | 9 (0.07)   | 7 (0.05)   | 5 (0.04)   |
| <b>Physical activity</b>      |                |                          |            |            |            |
| Irregular non-intense         | 30,296 (98.91) | 253 (0.83)               | 35 (0.11)  | 29 (0.09)  | 18 (0.06)  |
| Regular non-intense           | 13,414 (99.17) | 88 (0.65)                | 11 (0.08)  | 9 (0.07)   | 4 (0.03)   |
| Regular or irregular intense  | 5614 (98.66)   | 63 (1.11)                | 6 (0.11)   | 5 (0.09)   | 2 (0.04)   |
| <b>BMI (kg/m<sup>2</sup>)</b> | 26.7 (5.5)     | 25.9 (5.4)               | 24.0 (4.9) | 24.1 (5.2) | 24.6 (4.9) |
| <b>Hypertension †</b>         |                |                          |            |            |            |
| Normotensive                  | 28,309 (98.94) | 237 (0.83)               | 31 (0.11)  | 25 (0.09)  | 10 (0.03)  |
| Hypertensive                  | 20,960 (98.95) | 168 (0.79)               | 21 (0.10)  | 18 (0.08)  | 15 (0.07)  |
| <b>Self-reported diabetes</b> |                |                          |            |            |            |
| Non-diabetic                  | 46,097 (98.99) | 360 (0.77)               | 43 (0.09)  | 42 (0.09)  | 23 (0.05)  |
| Diabetic                      | 3,392 (98.35)  | 45 (1.30)                | 9 (0.26)   | 1 (0.03)   | 2 (0.06)   |

Figures are the number of participants (percentage), except for age and body mass index (BMI), for which mean (standard deviation) is presented. Numbers may not add up to the total numbers due to missing data in some variables. Among HD cases, those who started water-pipe smoking after HD being diagnosed were excluded.

† Including self-reported hypertension and individuals with high blood pressure at the baseline examination.

**Supplementary Table 7. Distribution of covariates by cigarette smoking**

| Covariate                     | Never          | Ever<br>(pack-years) |             |             |              |
|-------------------------------|----------------|----------------------|-------------|-------------|--------------|
|                               |                | ≤ 5                  | 5.1-10      | 10.1-20     | > 20         |
| <b>Total</b>                  | 41,445 (82.89) | 2742 (5.48)          | 1260 (2.52) | 1798 (3.6)  | 2755 (5.51)  |
| <b>Age (years)</b>            | 52.0 (9.0)     | 51.9 (9.2)           | 51.7 (8.8)  | 51.5 (8.8)  | 55.2 (9.0)   |
| <b>Sex</b>                    |                |                      |             |             |              |
| Women                         | 28,373 (98.52) | 284 (0.99)           | 58 (0.20)   | 46 (0.16)   | 39 (0.14)    |
| Men                           | 13,072 (61.66) | 2458 (11.59)         | 1202 (5.67) | 1752 (8.26) | 2716 (12.81) |
| <b>Ethnicity</b>              |                |                      |             |             |              |
| Non-Turkmen                   | 10,713 (83.83) | 714 (5.59)           | 266 (2.08)  | 435 (3.40)  | 651 (5.09)   |
| Turkmen                       | 30,732 (82.57) | 2028 (5.45)          | 994 (2.67)  | 1363 (3.66) | 2104 (5.65)  |
| <b>Place of residence</b>     |                |                      |             |             |              |
| Rural                         | 33,263 (83.20) | 2222 (5.56)          | 989 (2.47)  | 1380 (3.45) | 2127 (5.32)  |
| Urban                         | 8182 (81.66)   | 520 (5.19)           | 271 (2.70)  | 418 (4.17)  | 628 (6.27)   |
| <b>Education</b>              |                |                      |             |             |              |
| No School                     | 30,923 (88.13) | 1351 (3.85)          | 530 (1.51)  | 806 (2.30)  | 1479 (4.21)  |
| Primary/middle school         | 7668 (71.67)   | 935 (8.74)           | 474 (4.43)  | 669 (6.25)  | 953 (8.91)   |
| High school                   | 2102 (66.73)   | 348 (11.05)          | 202 (6.41)  | 241 (7.65)  | 257 (8.16)   |
| University                    | 752 (70.81)    | 108 (10.17)          | 54 (5.08)   | 82 (7.72)   | 66 (6.21)    |
| <b>Wealth</b>                 |                |                      |             |             |              |
| Low                           | 11,896 (81.65) | 883 (6.06)           | 377 (2.59)  | 549 (3.77)  | 865 (5.94)   |
| Low-Medium                    | 8434 (83.57)   | 524 (5.19)           | 240 (2.38)  | 340 (3.37)  | 554 (5.49)   |
| Medium-High                   | 10,315 (83.61) | 640 (5.19)           | 302 (2.45)  | 428 (3.47)  | 652 (5.28)   |
| High                          | 10,797 (83.07) | 695 (5.35)           | 341 (2.62)  | 481 (3.70)  | 684 (5.26)   |
| <b>Physical activity</b>      |                |                      |             |             |              |
| Irregular non-intense         | 27,215 (88.87) | 1045 (3.41)          | 463 (1.51)  | 660 (2.16)  | 1240 (4.05)  |
| Regular non-intense           | 10,217 (75.58) | 1093 (8.08)          | 523 (3.87)  | 746 (5.52)  | 940 (6.95)   |
| Regular or irregular intense  | 3862 (67.86)   | 597 (10.49)          | 273 (4.80)  | 389 (6.84)  | 570 (10.02)  |
| <b>BMI (kg/m<sup>2</sup>)</b> | 27.2 (5.5)     | 24.8 (4.8)           | 24.2 (4.7)  | 24.0 (4.6)  | 23.7 (4.5)   |
| <b>Hypertension †</b>         |                |                      |             |             |              |
| Normotensive                  | 22,904 (80.07) | 1817 (6.35)          | 862 (3.01)  | 1233 (4.31) | 1788 (6.25)  |
| Hypertensive                  | 18,373 (86.76) | 911 (4.30)           | 391 (1.85)  | 547 (2.58)  | 954 (4.51)   |
| <b>Self-reported diabetes</b> |                |                      |             |             |              |
| Non-diabetic                  | 38,398 (82.48) | 2607 (5.60)          | 1204 (2.59) | 1732 (3.72) | 2612 (5.61)  |
| Diabetic                      | 3047 (88.40)   | 135 (3.92)           | 56 (1.62)   | 66 (1.91)   | 143 (4.15)   |

Figures are the number of participants (percentage), except for age and body mass index (BMI), for which mean (standard deviation) is presented. Numbers may not add up to the total numbers due to missing data in some variables. Among HD cases, those who started cigarette smoking after HD being diagnosed were excluded.

† Including self-reported hypertension and individuals with high blood pressure at the baseline examination.



**Supplementary Table 8.** Distribution of covariates by nass chewing

| Covariate                     | Never          | Ever (nass-year) |            |            |            |
|-------------------------------|----------------|------------------|------------|------------|------------|
|                               |                | ≤ 50             | 50.1-100   | 100.1-180  | > 180      |
| <b>Total</b>                  | 46,264 (92.55) | 1762 (3.52)      | 635 (1.27) | 532 (1.06) | 797 (1.59) |
| <b>Age (years)</b>            | 51.8 (8.9)     | 53.8 (9.4)       | 56.5 (9.6) | 57.8 (9.1) | 61.6 (8.8) |
| <b>Sex</b>                    |                |                  |            |            |            |
| Women                         | 28,511 (98.98) | 213 (0.74)       | 40 (0.14)  | 15 (0.05)  | 26 (0.09)  |
| Men                           | 17,753 (83.80) | 1549 (7.31)      | 595 (2.81) | 517 (2.44) | 771 (3.64) |
| <b>Ethnicity</b>              |                |                  |            |            |            |
| Non-Turkmen                   | 11,826 (92.55) | 457 (3.58)       | 149 (1.17) | 130 (1.02) | 216 (1.69) |
| Turkmen                       | 34,438 (92.55) | 1305 (3.51)      | 486 (1.31) | 402 (1.08) | 581 (1.56) |
| <b>Place of residence</b>     |                |                  |            |            |            |
| Rural                         | 36,498 (91.34) | 1633 (4.09)      | 592 (1.48) | 495 (1.24) | 742 (1.86) |
| Urban                         | 9766 (97.37)   | 129 (1.29)       | 43 (0.43)  | 37 (0.37)  | 55 (0.55)  |
| <b>Education</b>              |                |                  |            |            |            |
| No School                     | 32,344 (92.19) | 1175 (3.35)      | 476 (1.36) | 412 (1.17) | 678 (1.93) |
| Primary/middle school         | 9851 (92.13)   | 488 (4.56)       | 138 (1.29) | 107 (1.00) | 109 (1.02) |
| High school                   | 3009 (95.58)   | 96 (3.05)        | 21 (0.67)  | 12 (0.38)  | 10 (0.32)  |
| University                    | 1060 (99.62)   | 3 (0.28)         | 0 (0.00)   | 1 (0.09)   | 0 (0.00)   |
| <b>Wealth</b>                 |                |                  |            |            |            |
| Low                           | 12,748 (87.49) | 851 (5.84)       | 294 (2.02) | 261 (1.79) | 417 (2.86) |
| Low-Medium                    | 9201 (91.23)   | 407 (4.04)       | 166 (1.65) | 127 (1.26) | 185 (1.83) |
| Medium-High                   | 11,656 (94.48) | 321 (2.60)       | 118 (0.96) | 101 (0.82) | 141 (1.14) |
| High                          | 12,656 (97.41) | 183 (1.41)       | 57 (0.44)  | 43 (0.33)  | 54 (0.42)  |
| <b>Physical activity</b>      |                |                  |            |            |            |
| Irregular non-intense         | 28,779 (94.00) | 810 (2.65)       | 319 (1.04) | 261 (0.87) | 442 (1.44) |
| Regular non-intense           | 12,399 (91.72) | 550 (4.07)       | 184 (1.36) | 149 (1.10) | 236 (1.75) |
| Regular or irregular intense  | 4926 (86.57)   | 400 (7.03)       | 129 (2.27) | 118 (2.07) | 117 (2.06) |
| <b>BMI (kg/m<sup>2</sup>)</b> | 26.9 (5.5)     | 23.3 (4.5)       | 23.6 (4.6) | 22.9 (4.2) | 23.1 (4.2) |
| <b>Hypertension †</b>         |                |                  |            |            |            |
| Normotensive                  | 26,287 (91.91) | 1166 (4.08)      | 408 (1.43) | 312 (1.09) | 429 (1.50) |
| Hypertensive                  | 19,776 (93.42) | 584 (2.76)       | 225 (1.06) | 218 (1.03) | 365 (1.72) |
| <b>Self-reported diabetes</b> |                |                  |            |            |            |
| Non-diabetic                  | 42,968 (92.32) | 1693 (3.64)      | 615 (1.32) | 502 (1.08) | 765 (1.64) |
| Diabetic                      | 3296 (95.62)   | 69 (2.00)        | 20 (0.58)  | 30 (0.87)  | 32 (0.93)  |

Figures are the number of participants (percentage), except for age and body mass index (BMI), for which mean (standard deviation) is presented. Numbers may not add up to the total numbers due to missing data in some variables. Among HD cases, those who started nass chewing after HD being diagnosed were excluded.

† Including self-reported hypertension and individuals with high blood pressure at the baseline examination.
